# Supplementary material for: Using SMART Magnetic Fluids and Gels for Prevention and Destruction of Bacterial Biofilms
Source: MDPI journal article supplement (doi:10.3390/microorganisms11061515), 2023-06-07
Supplement: s1 [file s1]

# Using SMART Magnetic Fluids and Gels for Prevention and Destruction of Bacterial Biofilms

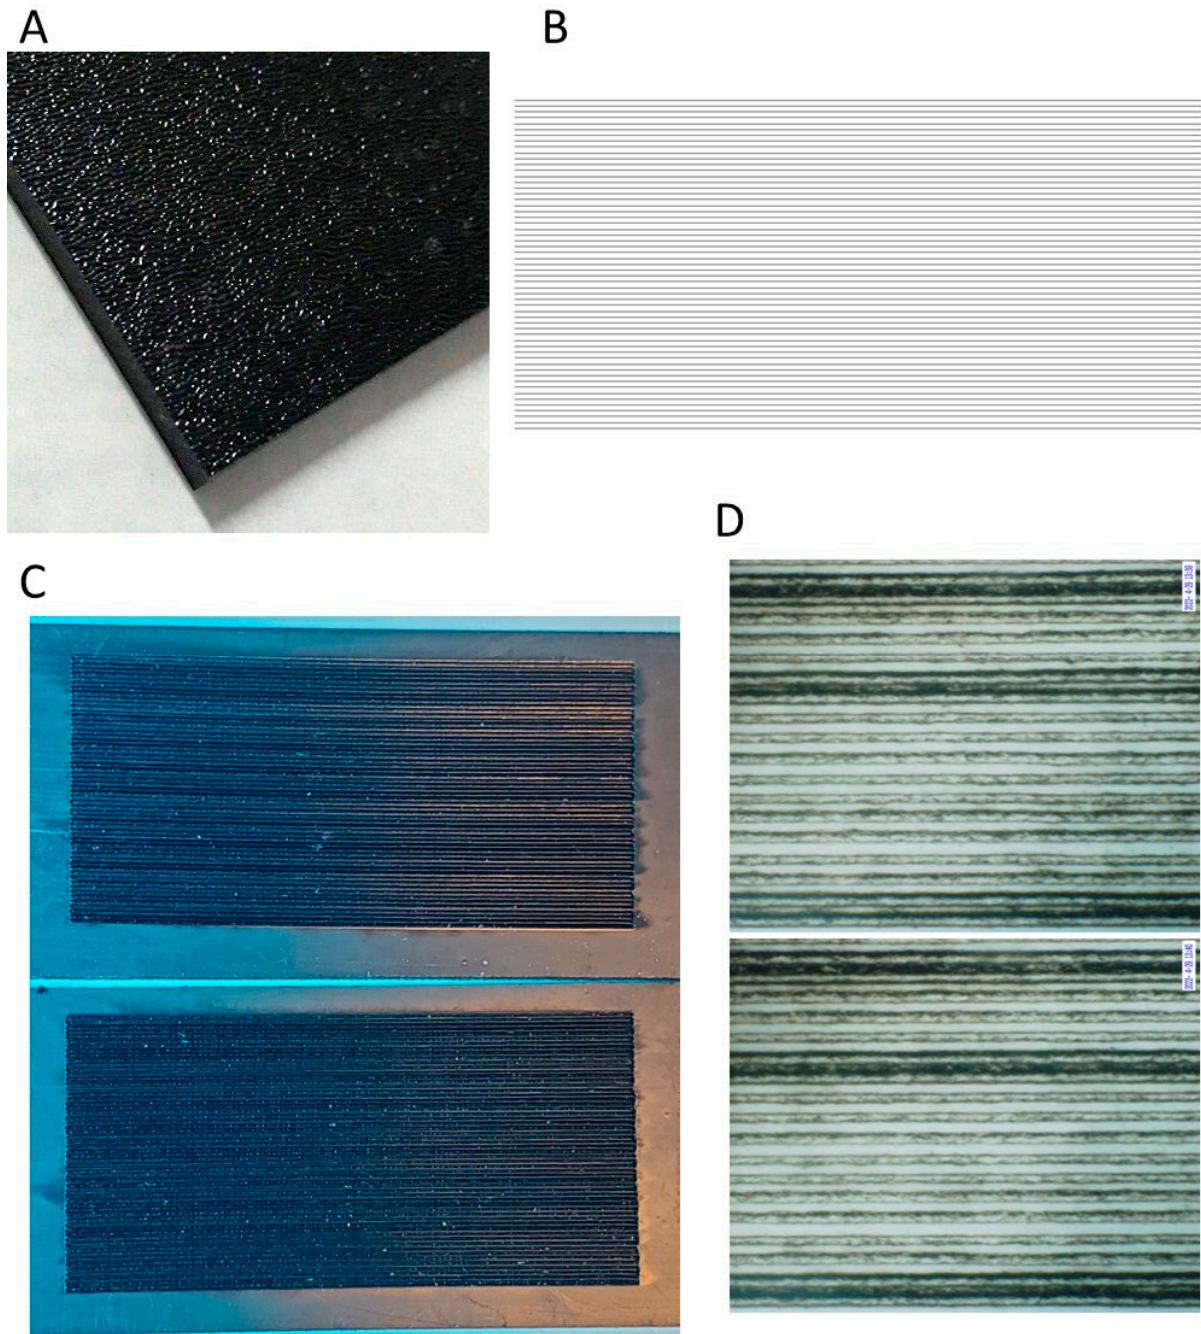

**Fig. S1. Laser surface texturing of ABS plate.** A) original single-side texture, B) grid file for texturing, C) engraved slides D) laser engraved surface.

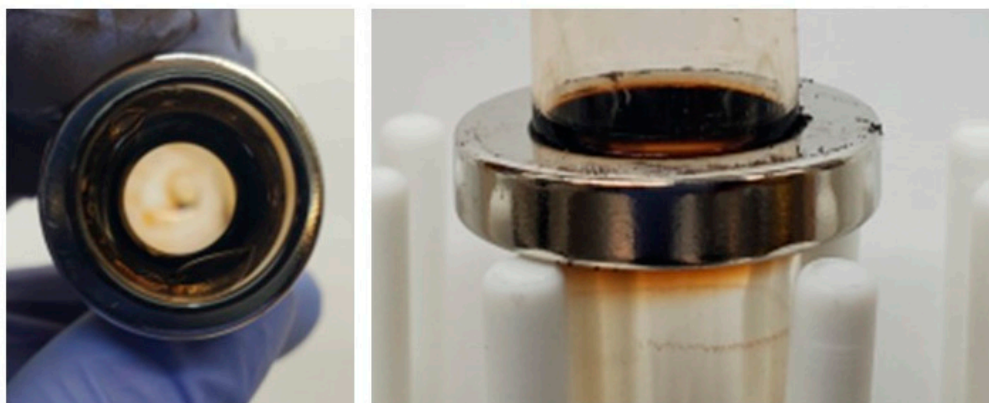

**Fig. S2. Ring of FF inside the culture tube.**

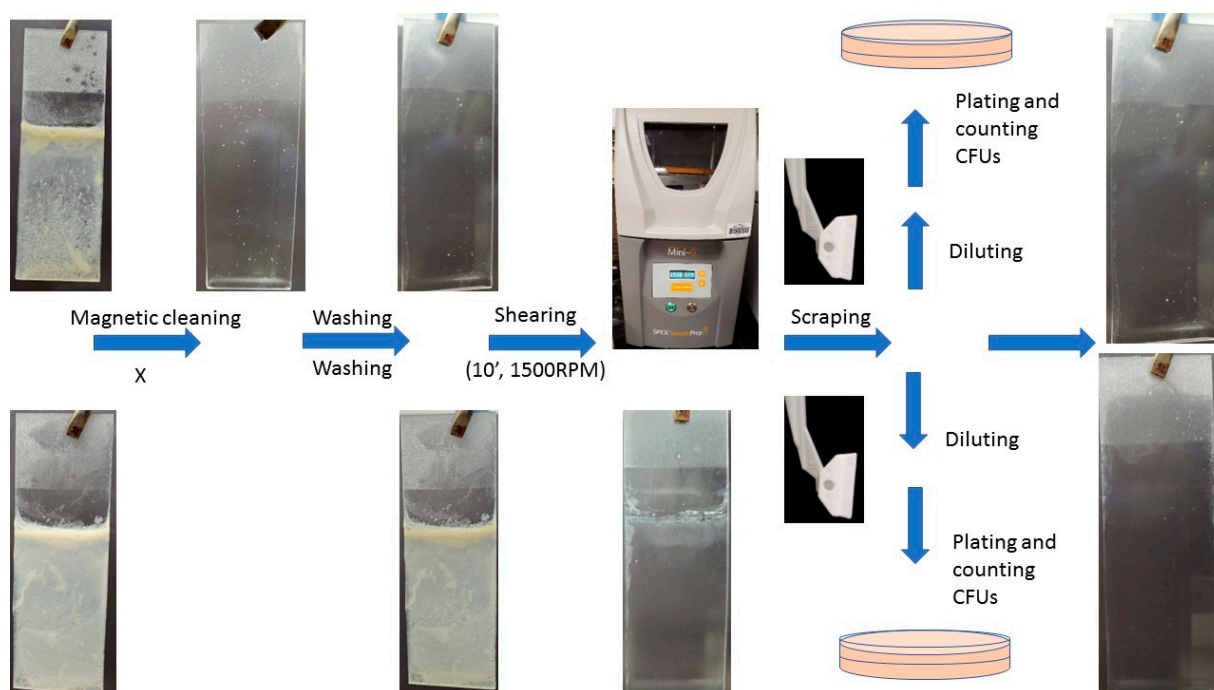

**Fig. S3. Graphical representation of slide biofilm removal experiment with colony counting.**

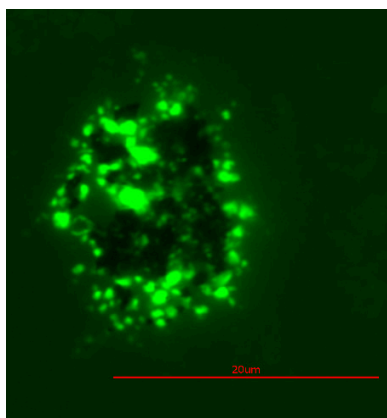

**Fig. S4. Bacterial cells attached to the IO particles. Red bar scales represent 20 μm.**

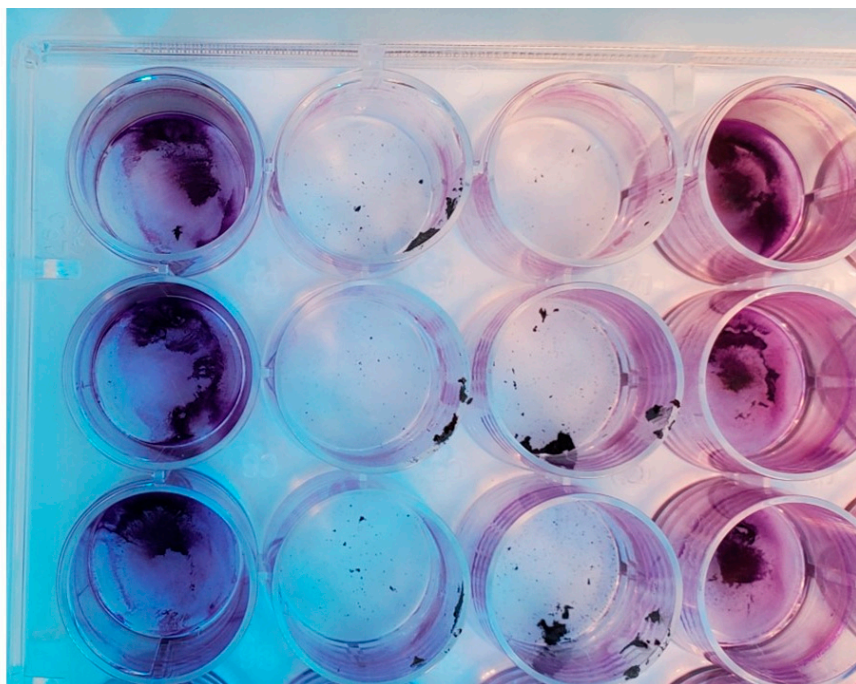

**Fig. S5. Bacterial biofilm stained with CV attached to the bottom of a 24-well plate removed by SMARTFs. Rows: 1,4 not treated controls, 2-3 wells treated with MRFs and FG.**
