# Supplementary material for: Using SMART Magnetic Fluids and Gels for Prevention and Destruction of Bacterial Biofilms
Source: Microorganisms. 2023 Jun 7;11(6):1515. doi: 10.3390/microorganisms11061515 (PMC10305264; doi:10.3390/microorganisms11061515)
Supplement: Supplementary file 1 [file microorganisms-11-01515-s001.zip]

Archive with 4 entries (4 files):
- microorganisms-2446098-supplementary.pdf
- Suppementary VideoS3.MP4
- Supplementary VideoS1.MP4
- Supplementary VideoS2.MP4
